# Supplementary material for: Aryl/hetero-arylethyne bridged dyes: the effect of planar π-bridge on the performance of dye-sensitized solar cells
Source: Royal Society of Chemistry journal article supplement (doi:10.1039/c0nj00653j), 2010-10-19

# Supporting Information

## Aryl/Hetero-Arylethyne Bridged Dyes: The Effect of Planar $\pi$ -Bridge on the Performance of Dye-Sensitized Solar Cells

Jun-Ling Song,<sup>a</sup> Pitchamuthu Amaladass,<sup>a</sup> Shu-Hao Wen,<sup>b</sup> Kalyan Kumar Pasunooti,<sup>a</sup> Yao-Lun Yu,<sup>b</sup> An Li,<sup>a</sup> Xin Wang,<sup>b</sup> Wei-Qiao Deng,<sup>\*c</sup> and Xue-Wei Liu<sup>\*a</sup>

<sup>a</sup> Division of Chemistry and Biological Chemistry, School of Physical & Mathematical Sciences, Nanyang Technological University, Singapore 637371, Singapore; <sup>b</sup> Division of Chemical and Biomolecular Engineering, School of Chemical and Biomedical Engineering, Nanyang Technological University, Singapore 638798; <sup>c</sup> Dalian Institute of Chemical Physics, Chinese Academy of Sciences, Dalian 116023, P.R. China;

E-mail: [xuwei@ntu.edu.sg](mailto:xuwei@ntu.edu.sg) and [dengwq@dicp.ac.cn](mailto:dengwq@dicp.ac.cn)

### Contents:

- Table S1.** Molecular orbital contribution (MOC) of the 5 highest occupied and 5 lowest unoccupied molecular orbitals of **D1**, **D2** and **D3** calculated at the B3LYP/6-31G\* level in chloroform solution.
- Table S2.** Computed excited energies (eV), oscillator strengths (f) for **D1**, **D2** and **D3** in chloroform calculated using TD-B3LYP/6-31G\*//B3LYP/6-31G\* using C-PCM framework
- Figure S1.** The UV-Vis absorption and fluorescence of dye sensitizers in this study.
- Figure S2.** Cyclic voltammetry of **D1**, **D2** and **D3**.
- Figure S3.** <sup>1</sup>H NMR spectrum of  
**4-(2-(4-(bis(4-methoxyphenyl)amino)phenyl)ethynyl)benzaldehyde (7)**
- Figure S4.** <sup>13</sup>C NMR spectrum of  
**4-(2-(4-(bis(4-methoxyphenyl)amino)phenyl)ethynyl)benzaldehyde (7)**

**Figure S5.**  $^1\text{H}$  NMR spectrum of **5-(2-(4-(bis(4-methoxyphenyl)amino)phenyl)ethynyl)thiophene-2-carbaldehyde (11)**

**Figure S6.**  $^{13}\text{C}$  NMR spectrum of **5-(2-(4-(bis(4-methoxyphenyl)amino)phenyl)ethynyl)thiophene-2-carbaldehyde (11)**

**Figure S7.**  $^1\text{H}$  NMR spectrum of **Dye D2**

**Figure S8.**  $^{13}\text{C}$  NMR spectrum of **Dye D2**

**Figure S9.** HRMS spectrum of **Dye D2**

**Figure S10.**  $^1\text{H}$  NMR spectrum of **Dye D1**

**Figure S11.**  $^{13}\text{C}$  NMR spectrum of **Dye D1**

**Figure S12.** HRMS spectrum of **Dye D1**

**Figure S13.**  $^1\text{H}$  NMR spectrum of **5-(5-(2-(4-(bis(4-methoxyphenyl)amino)ethynyl)thiophene-2-yl)thiophe-2-carbaldehyde (16)**

**Figure S14.**  $^{13}\text{C}$  NMR spectrum of **5-(5-(2-(4-(bis(4-methoxyphenyl)amino)ethynyl)thiophene-2-yl)thiophe-2-carbaldehyde (16)**

**Figure S15.**  $^1\text{H}$  NMR spectrum of **Dye D3**

**Figure S16.**  $^{13}\text{C}$  NMR spectrum of **Dye D3**

**Figure S17.** HRMS spectrum of **Dye D3**

**Table S1.** Molecular orbital contribution (MOC) of the 5 highest occupied and 5 lowest unoccupied molecular orbitals of **D1**, **D2** and **D3** calculated at the B3LYP/6-31G\* level in chloroform solution

|             | Energy, eV | Donor | Triple-bond | Bridge | Acceptor |
|-------------|------------|-------|-------------|--------|----------|
| <b>D1</b>   |            |       |             |        |          |
| HOMO-4      | -6.983     | 99.9  | 0.0         | 0.0    | 0.0      |
| HOMO-3      | -6.850     | 67.3  | 3.1         | 15.2   | 14.5     |
| HOMO-2      | -6.291     | 99.8  | 0.1         | 0.0    | 0.0      |
| HOMO-1      | -6.041     | 53.3  | 17.4        | 19.1   | 10.2     |
| <b>HOMO</b> | -4.904     | 88.9  | 5.1         | 3.7    | 2.2      |
| <b>LUMO</b> | -2.737     | 7.9   | 6.3         | 29.7   | 56.1     |
| LUMO+1      | -1.002     | 52.3  | 13.2        | 15.2   | 19.3     |
| LUMO+2      | -0.524     | 99.9  | 0.0         | 0.1    | 0.0      |
| LUMO+3      | -0.308     | 0.3   | 0.0         | 99.1   | 0.6      |
| LUMO+4      | -0.136     | 98.9  | 0.7         | 0.2    | 0.2      |
|             |            |       |             |        |          |
| <b>D2</b>   |            |       |             |        |          |
| HOMO-4      | -7.010     | 96.1  | 0.5         | 1.5    | 1.9      |
| HOMO-3      | -6.762     | 66.3  | 2.6         | 15.0   | 16.0     |
| HOMO-2      | -6.310     | 99.8  | 0.2         | 0.0    | 0.0      |
| HOMO-1      | -5.926     | 42.4  | 14.2        | 26.8   | 16.7     |
| <b>HOMO</b> | -4.926     | 85.4  | 5.3         | 5.7    | 3.5      |
| <b>LUMO</b> | -2.749     | 9.3   | 7.3         | 37.9   | 45.5     |
| LUMO+1      | -1.099     | 43.1  | 11.4        | 24.6   | 20.9     |
| LUMO+2      | -0.552     | 99.9  | 0.0         | 0.1    | 0.0      |
| LUMO+3      | -0.159     | 97.4  | 0.8         | 1.2    | 0.5      |
| LUMO+4      | -0.067     | 66.7  | 1.8         | 20.6   | 10.9     |
|             |            |       |             |        |          |
| <b>D3</b>   |            |       |             |        |          |
| HOMO-4      | -6.936     | 81.1  | 3.5         | 9.6    | 5.8      |
| HOMO-3      | -6.430     | 54.9  | 6.5         | 24.9   | 13.7     |
| HOMO-2      | -6.297     | 99.8  | 0.1         | 0.0    | 0.0      |
| HOMO-1      | -5.618     | 33.3  | 9.1         | 46.6   | 11.1     |
| <b>HOMO</b> | -4.824     | 80.4  | 6.2         | 11.4   | 2.0      |
| <b>LUMO</b> | -2.819     | 3.9   | 3.1         | 53.2   | 39.8     |
| LUMO+1      | -1.587     | 20.1  | 9.7         | 52.0   | 18.2     |
| LUMO+2      | -0.550     | 46.8  | 5.3         | 38.2   | 9.7      |
| LUMO+3      | -0.499     | 100.0 | 0.0         | 0.0    | 0.0      |
| LUMO+4      | -0.119     | 99.1  | 0.8         | 0.1    | 0.0      |
|             |            |       |             |        |          |

**Table S2.** Computed excited energies (eV), oscillator strengths (f) for **D1**, **D2**, and **D3** in chloroform calculated using TD-B3LYP/6-31G\*\*/B3LYP/6-31G\* using C-PCM framework

|           | nm    | cm <sup>-1</sup> •(1000) | eV   | f      | Assignment<br>H=HOMO,L=LUMO,L+1=LUMO+1,etc. |
|-----------|-------|--------------------------|------|--------|---------------------------------------------|
| <b>D1</b> |       |                          |      |        |                                             |
|           | 638.5 | 15.7                     | 1.94 | 0.9358 | H-0->L+0(+92%)                              |
|           | 410.6 | 24.4                     | 3.02 | 0.9669 | H-1->L+0(+87%)                              |
|           | 375.4 | 26.6                     | 3.30 | 0.0107 | H-2->L+0(+99%)                              |
|           | 353.6 | 28.3                     | 3.51 | 0.3327 | H-0->L+1(+83%),H-3->L+0(+6%)                |
| <b>D2</b> |       |                          |      |        |                                             |
|           | 637.9 | 15.7                     | 1.94 | 1.0566 | H-0->L+0(+90%)                              |
|           | 424.9 | 23.5                     | 2.92 | 0.8808 | H-1->L+0(+84%)                              |
|           | 376.5 | 26.6                     | 3.29 | 0.0125 | H-2->L+0(+99%)                              |
|           | 359.3 | 27.8                     | 3.45 | 0.2470 | H-0->L+1(+82%),H-3->L+0(+9%)                |
| <b>D3</b> |       |                          |      |        |                                             |
|           | 697.0 | 14.3                     | 1.78 | 0.9931 | H-0->L+0(+92%)                              |
|           | 487.3 | 20.5                     | 2.54 | 1.0352 | H-1->L+0(+83%)                              |
|           | 423.0 | 23.6                     | 2.93 | 0.3406 | H-0->L+1(+85%)                              |
|           | 379.3 | 26.4                     | 3.27 | 0.0050 | H-2->L+0(+99%)                              |
|           | 369.3 | 27.1                     | 3.36 | 0.0830 | H-3->L+0(+84%)                              |

D1

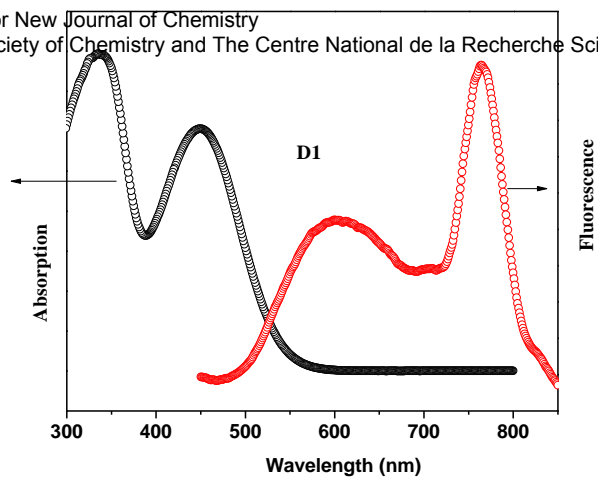

D2

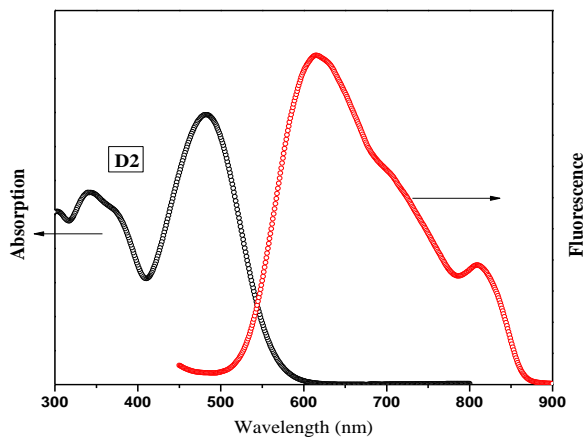

D3

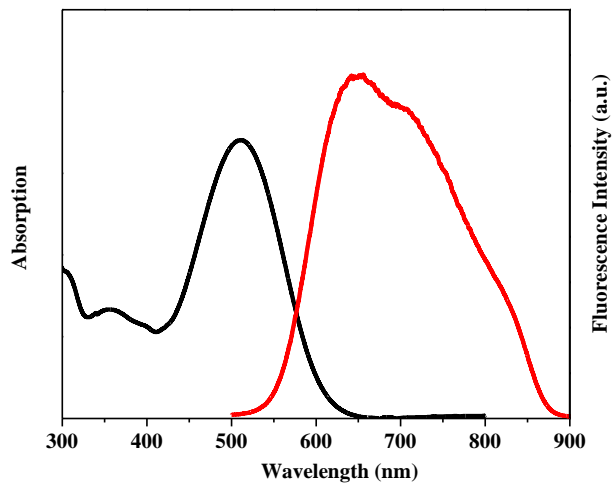

Figure S1. The UV-Vis absorption and fluorescence of dye sensitizers in this study.

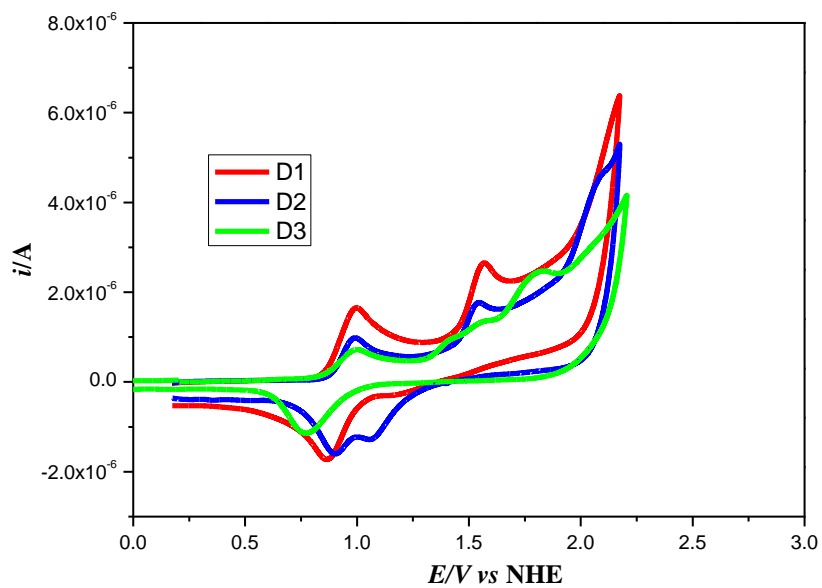

Figure S2. Cyclic voltammetry of **D1**, **D2** and **D3**.

**Figure S3.  $^1\text{H}$  NMR spectrum of 4-(2-(4-(Bis(4-methoxyphenyl) amino) phenyl) ethynyl)benzaldehyde (7)**

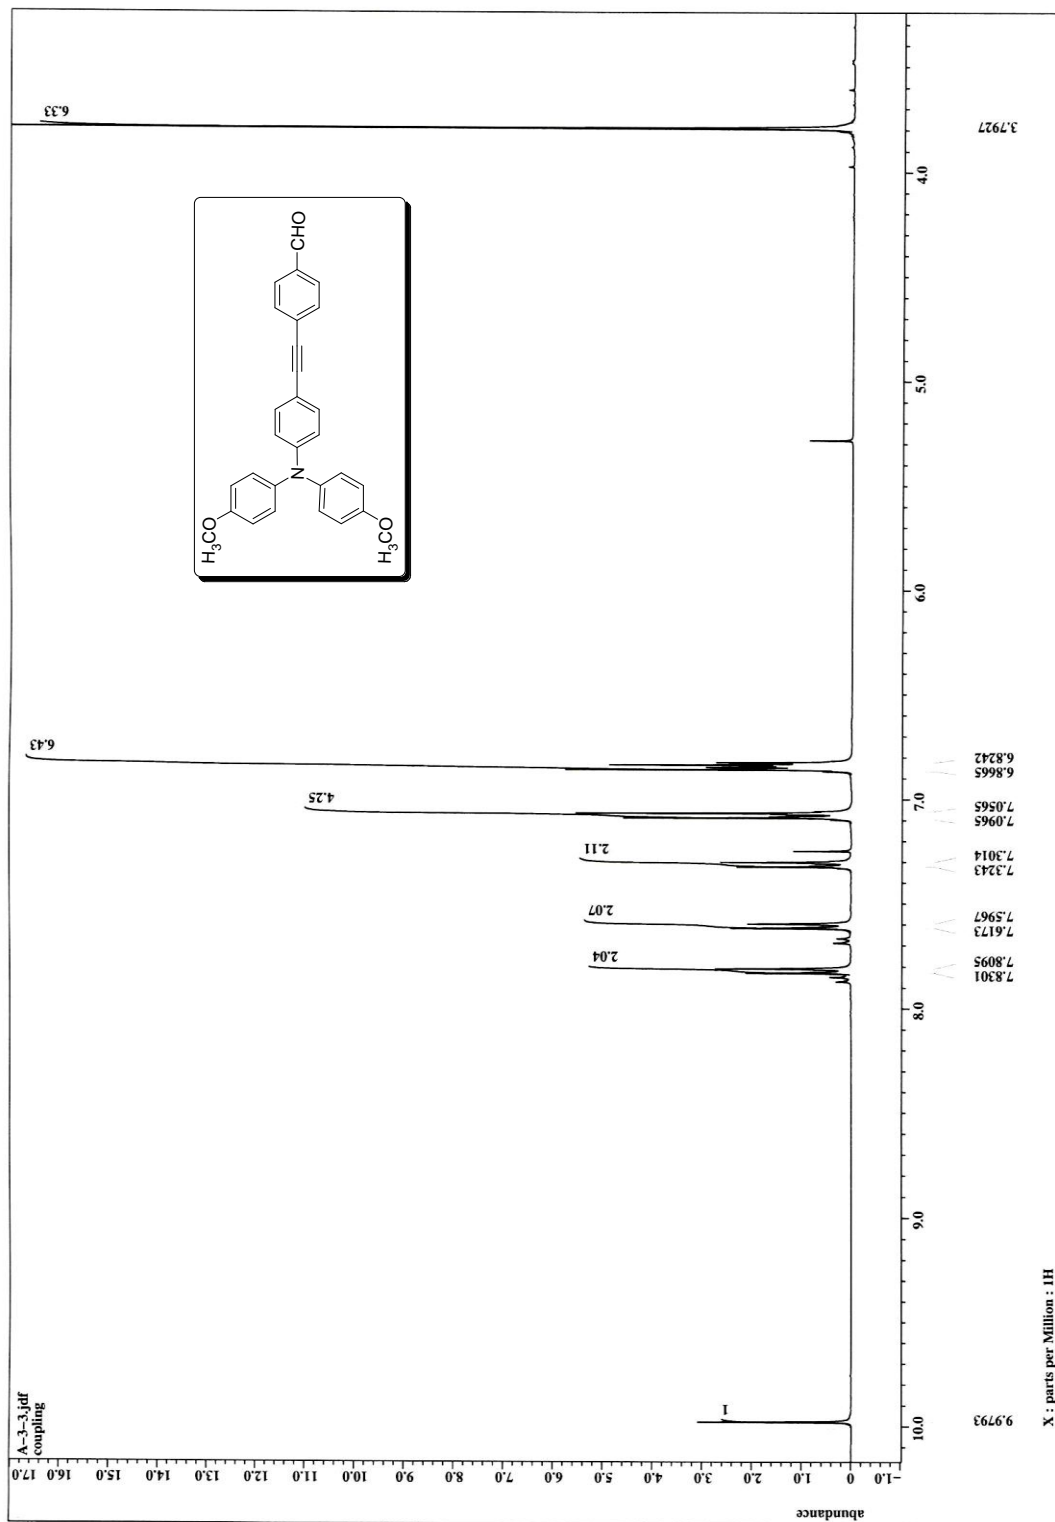

**Figure S4.  $^{13}\text{C}$  NMR spectrum of 4-(2-(4-(Bis (4-methoxyphenyl) amino) phenyl) ethynyl)benzaldehyde (7)**

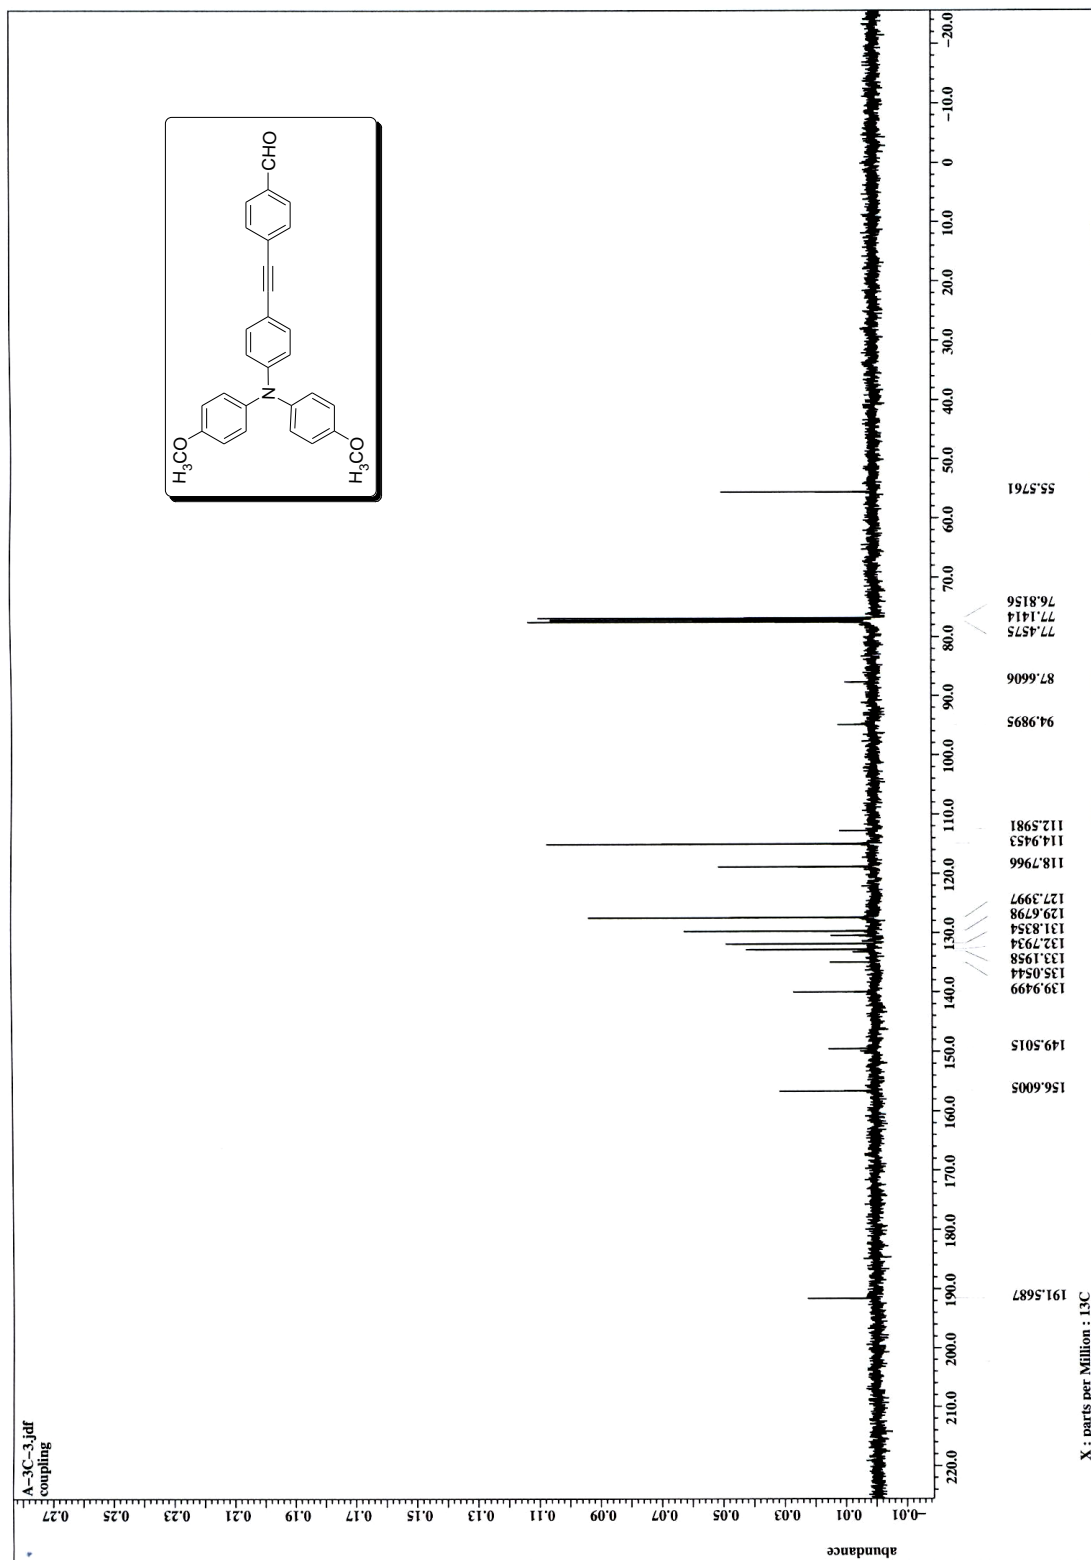





**Figure S6.**  $^{13}\text{C}$  NMR spectrum of 5-(2-(4-(bis(4-methoxyphenyl) amino) phenyl) ethynyl) thiophene-2-carbaldehyde (11)

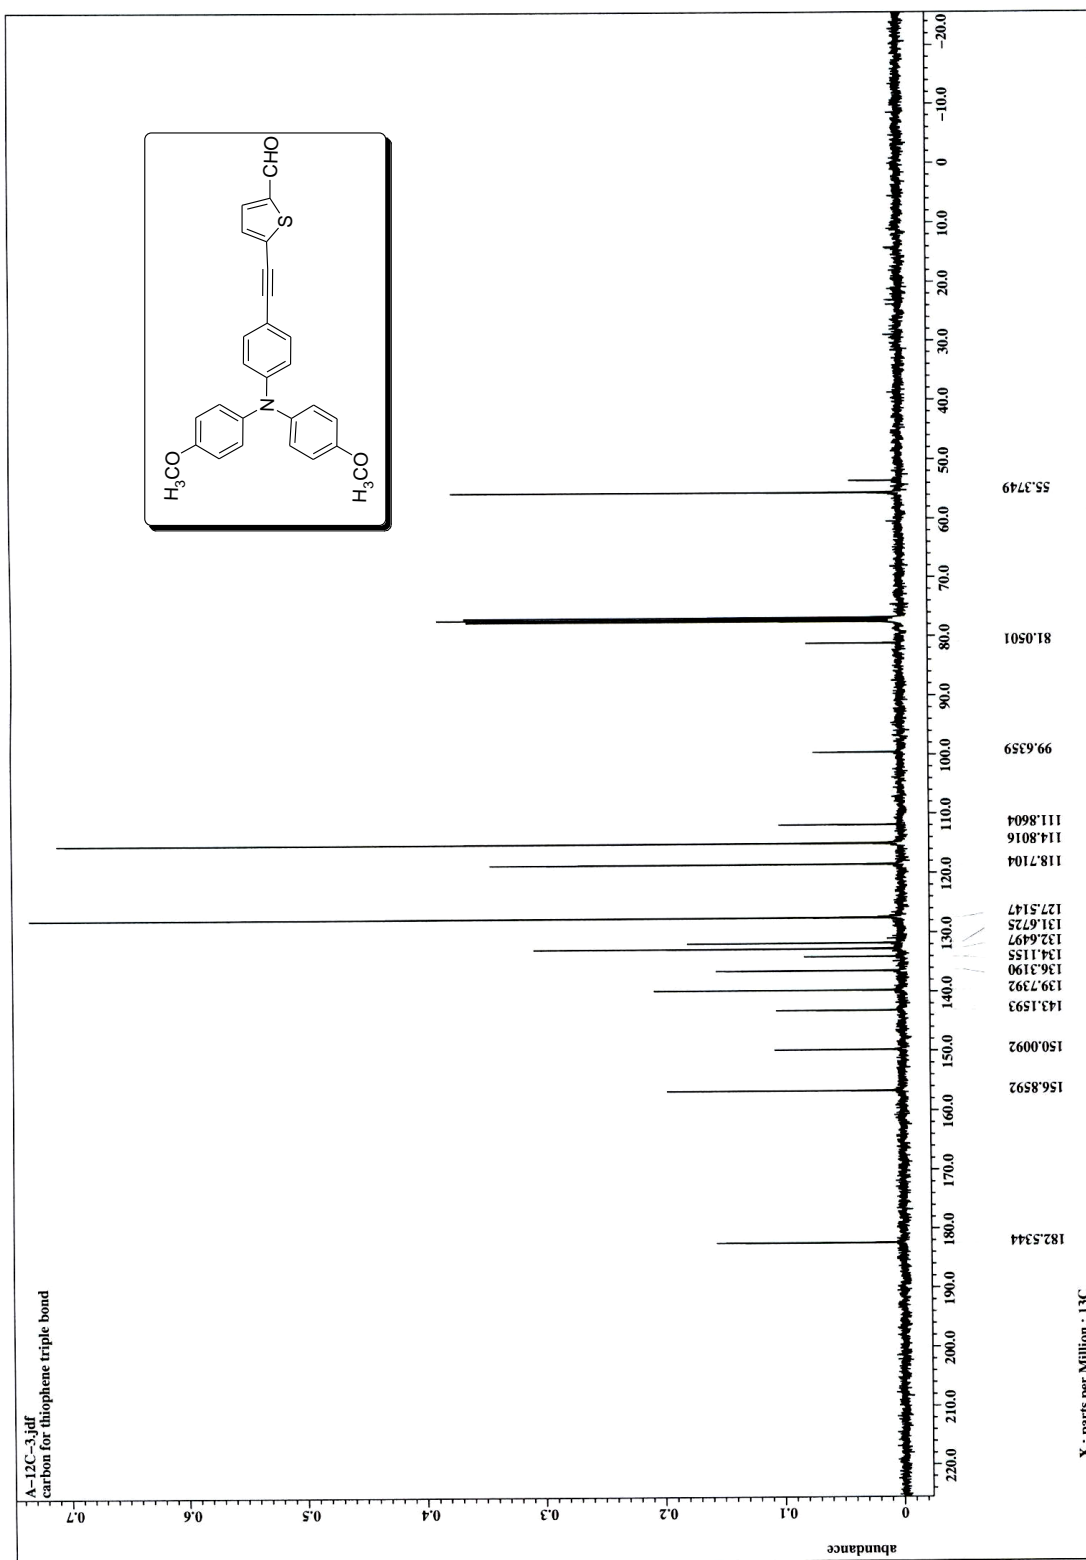

**Figure S7. <sup>1</sup>H NMR spectrum of Dye D2**

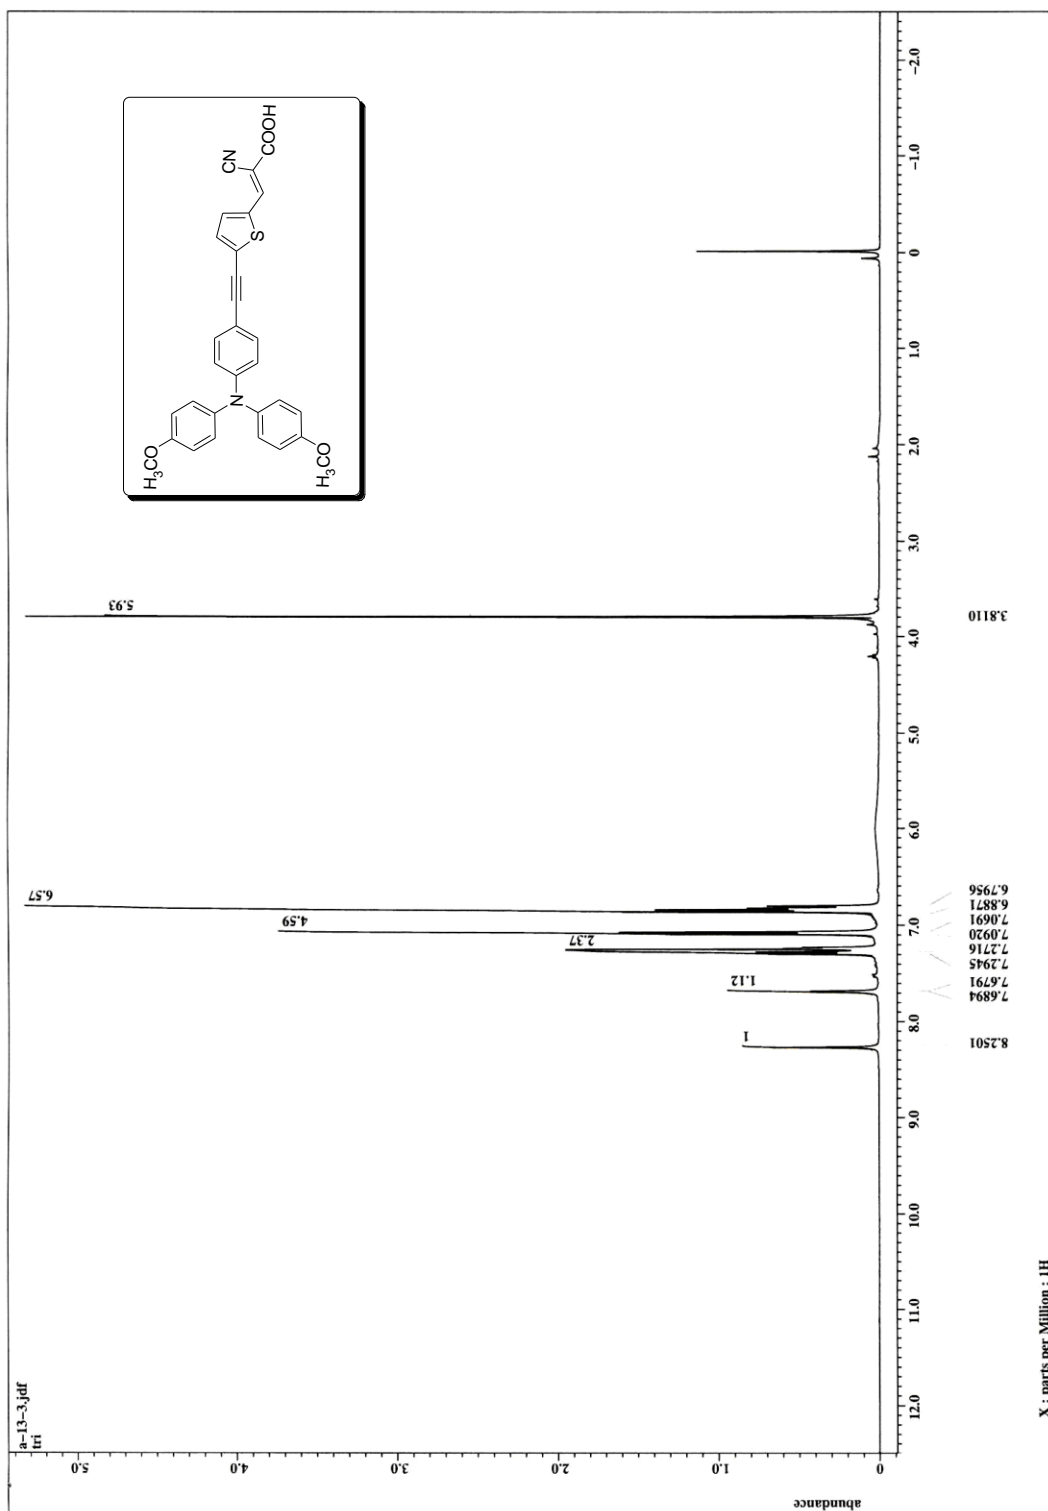

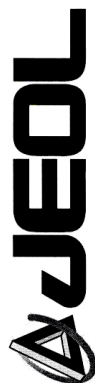

**Figure S8.**  $^{13}\text{C}$  NMR spectrum of Dye D2

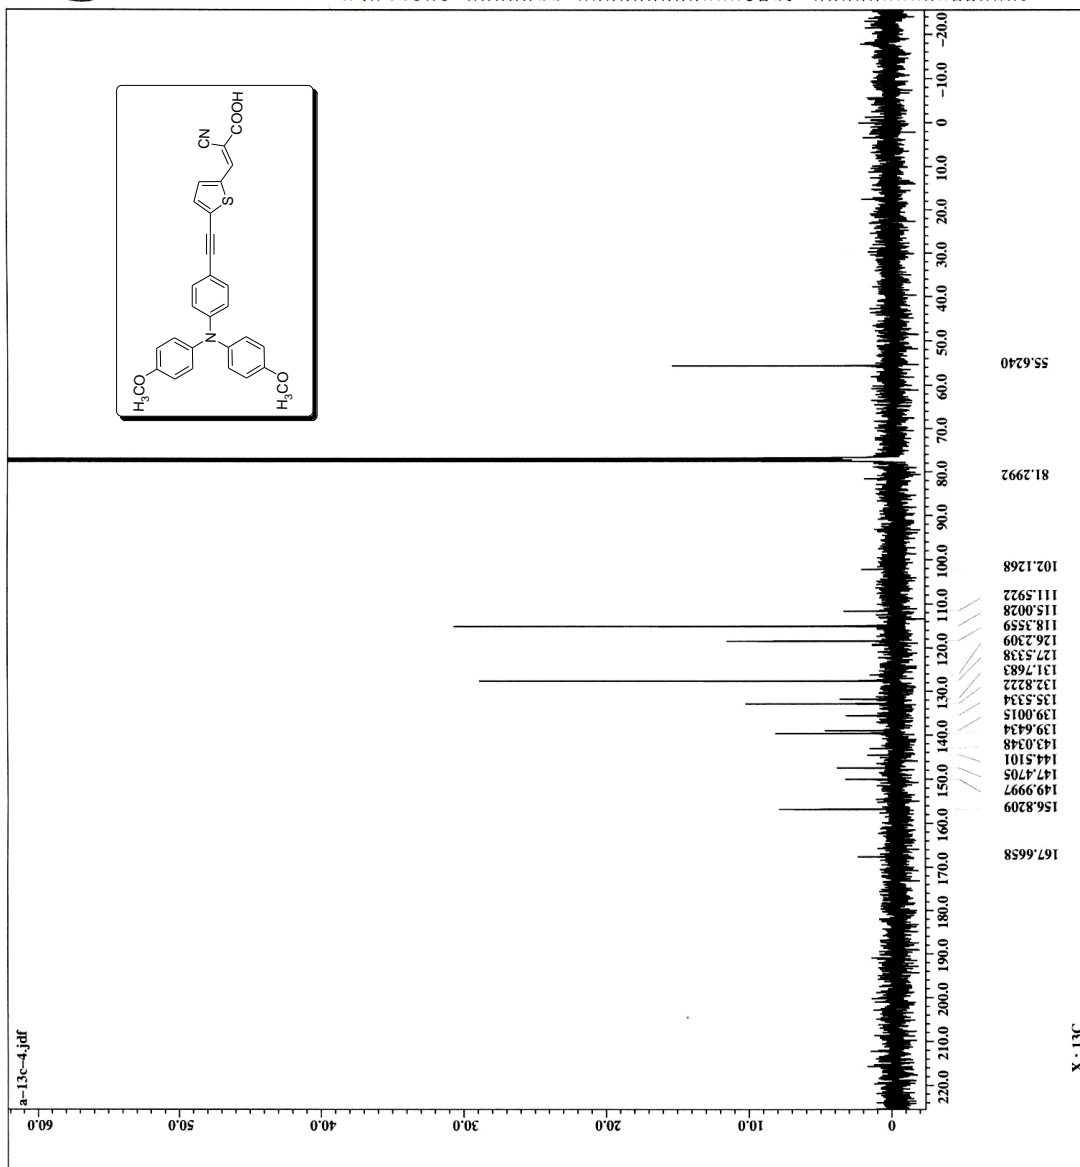

**Figure S9. HRMS spectrum of Dye D2**

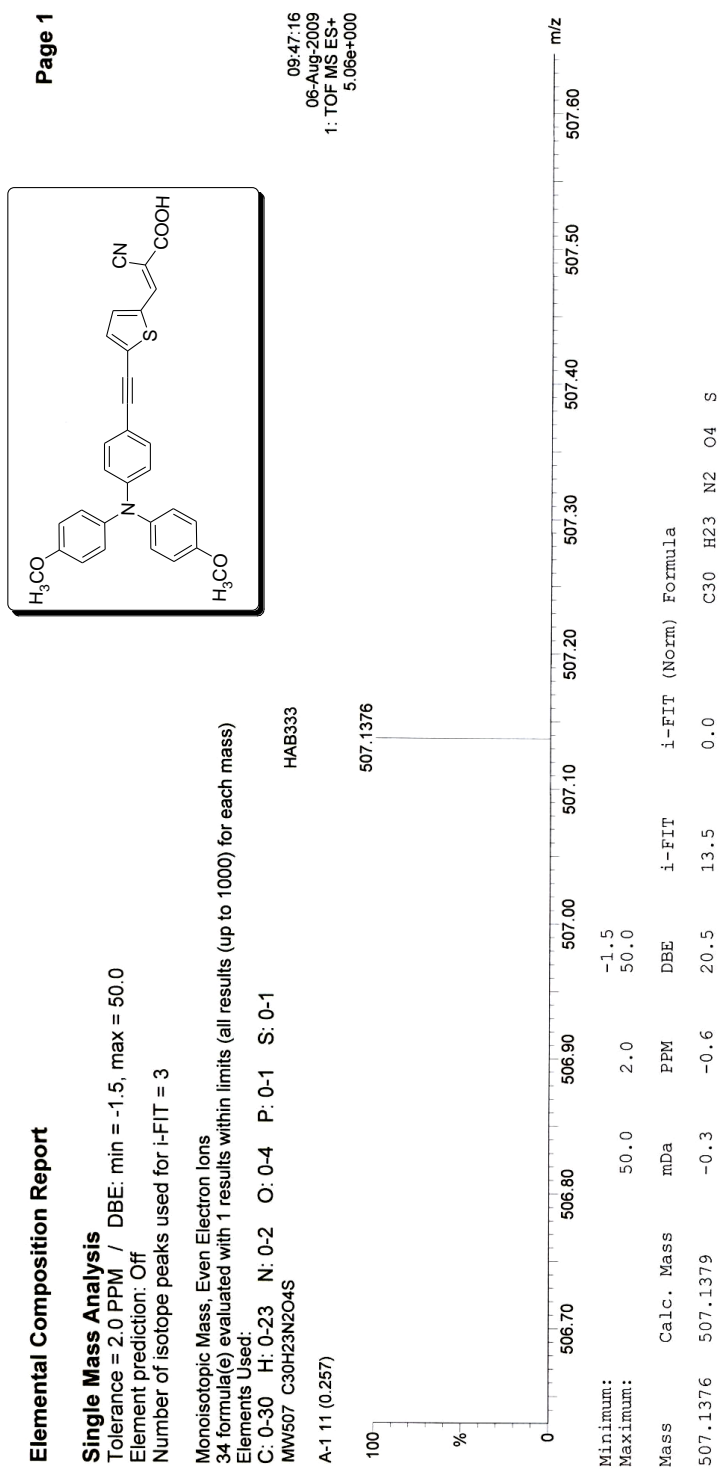

**Figure S10.**  $^1\text{H}$  NMR spectrum of Dye D1

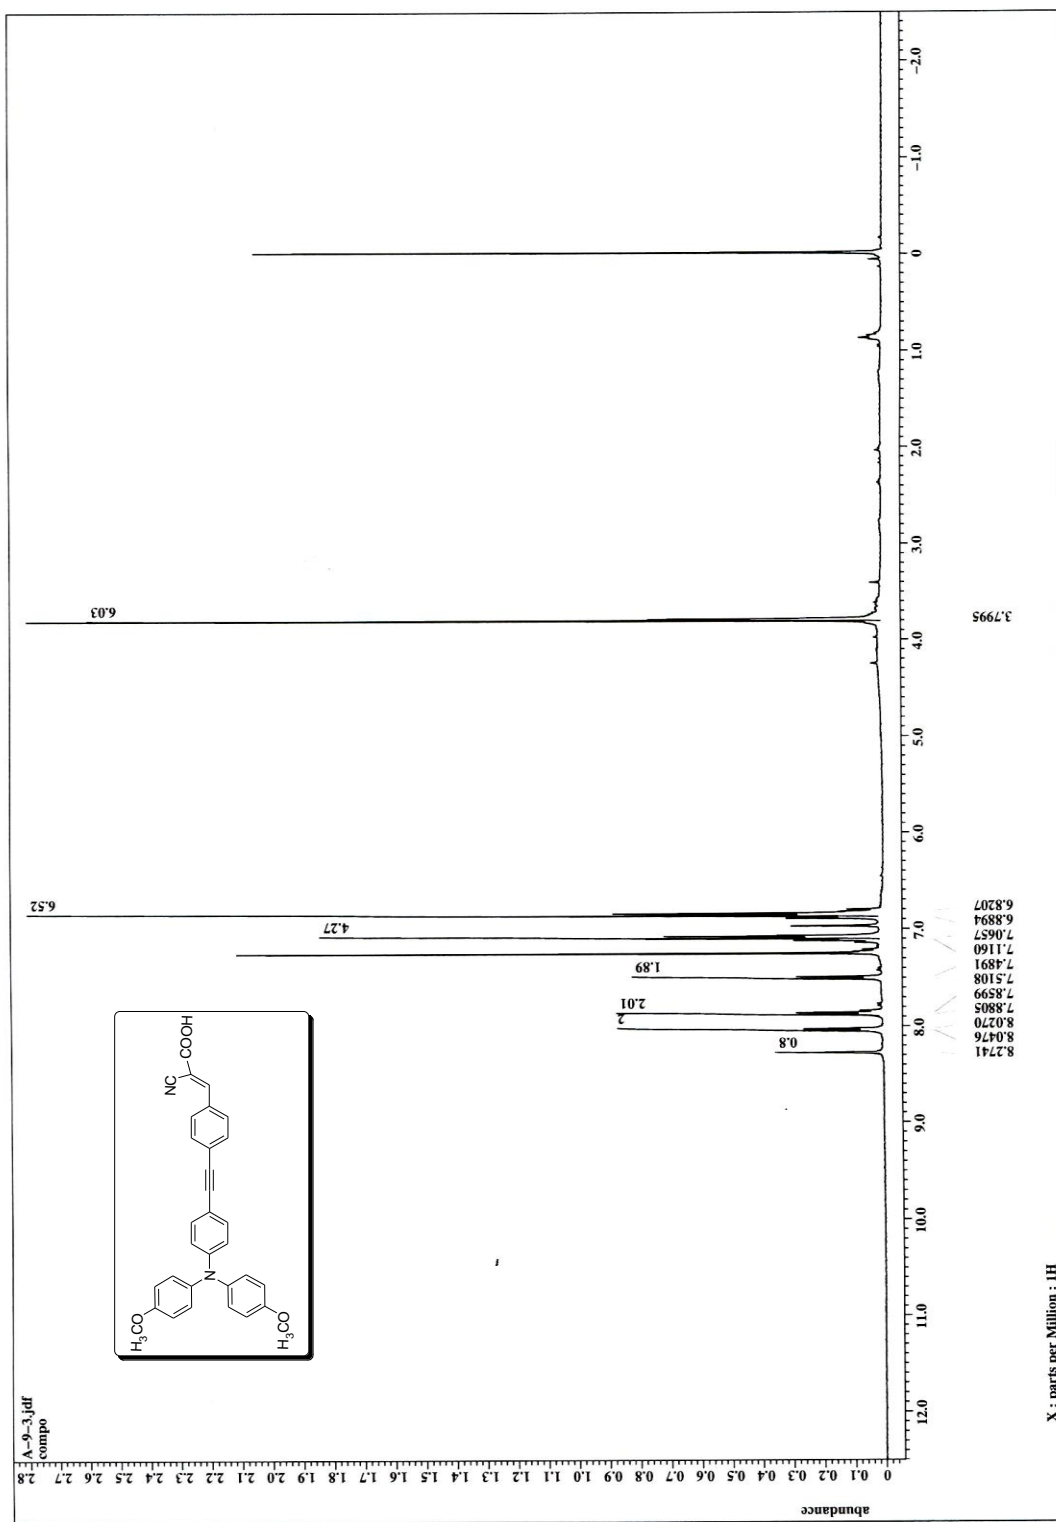

**Figure S11.**  $^{13}\text{C}$  NMR spectrum of Dye D1

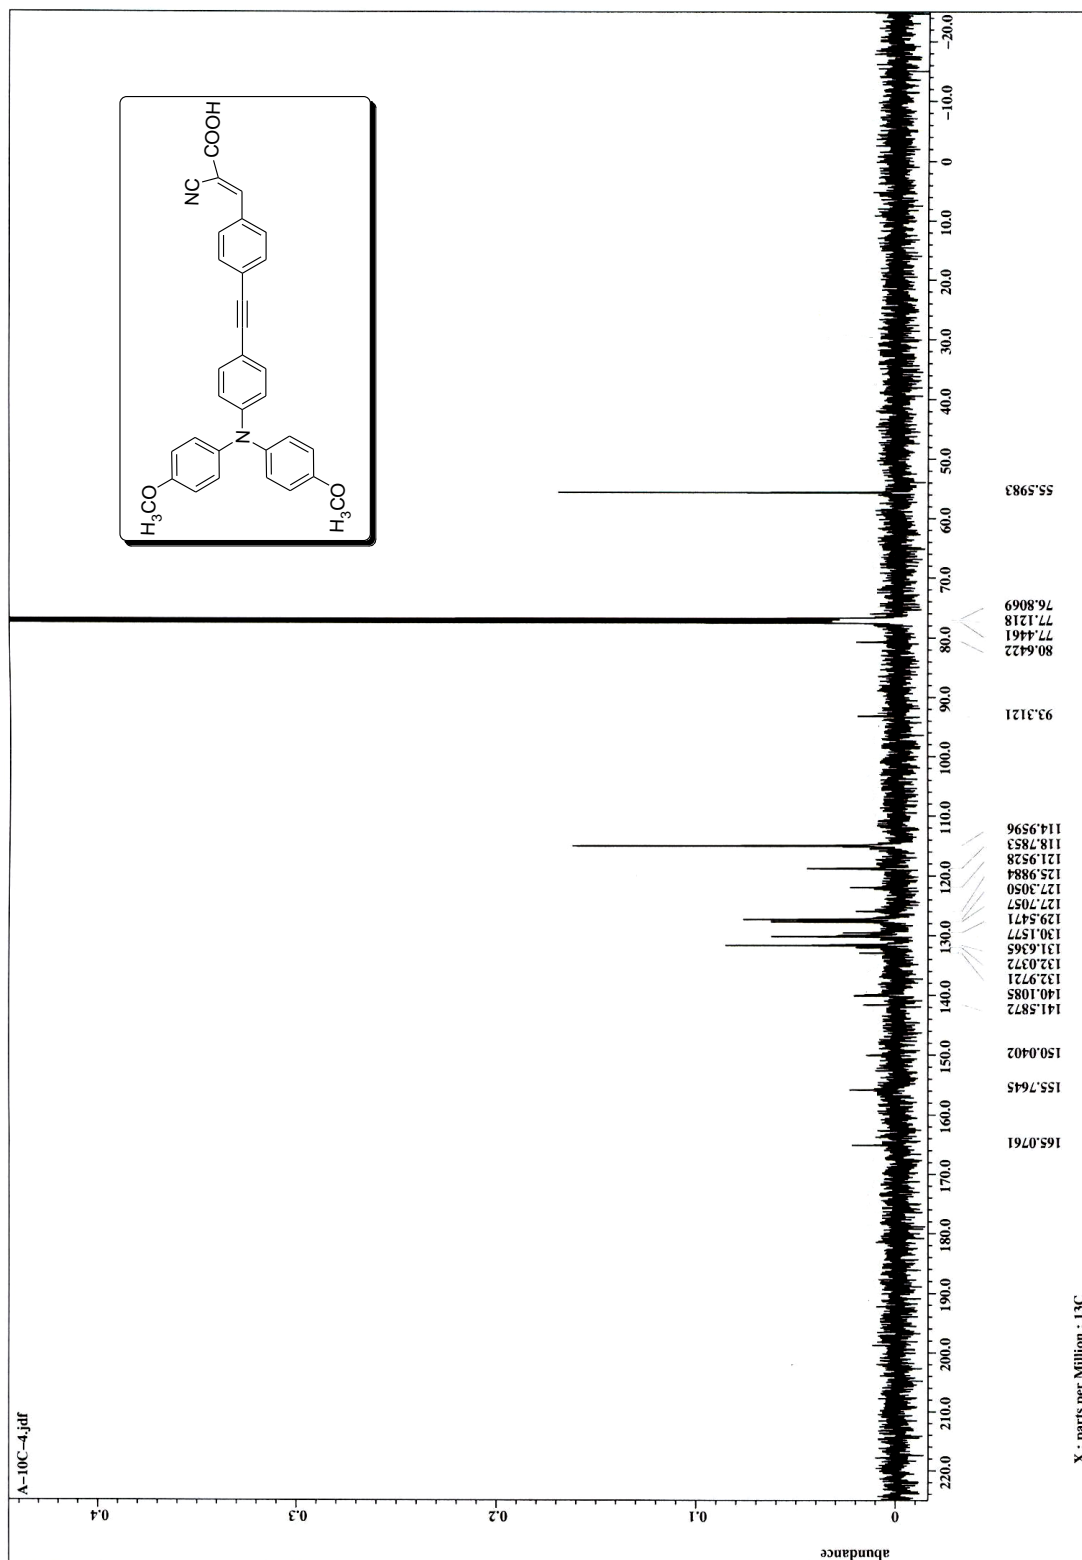

**Figure S12.HRMS spectrum of Dye D1**

Page 1

**Elemental Composition Report**

**Single Mass Analysis**

Tolerance = 2.0 PPM / DBE: min = -1.5, max = 50.0

Element prediction: Off

Number of isotope peaks used for i-FIT = 3

Monoisotopic Mass, Even Electron Ions

16 formula(e) evaluated with 1 results within limits (all results (up to 1000) for each mass)

Elements Used:

C: 0-32 H: 0-25 N: 0-2 O: 0-4 P: 0-1

MW501 C32H25N2O4

A-2.4 (0.101) Cm (4:17)

HAB333

501.1814

09:58:05  
 06-Aug-2009  
 1: TOF MS ES+  
 1.01e+001

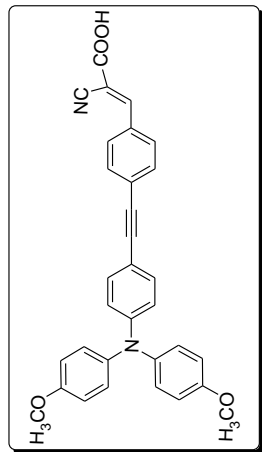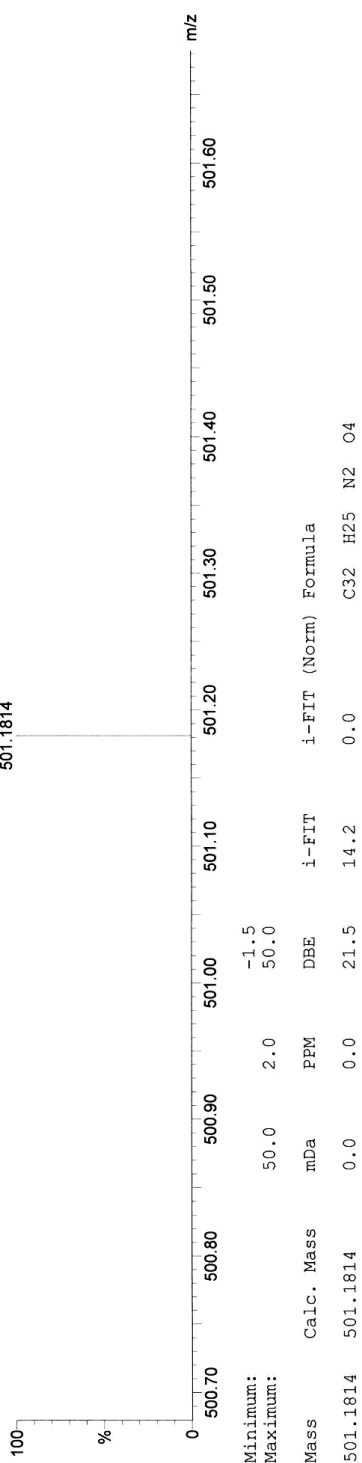



**Figure S13.**  $^1\text{H}$  NMR spectrum of 5-(5-(2-(4-(bis(4-methoxyphenyl)amino)ethynyl)thiophene-2-yl)thiophene-2-carbaldehyde (16)

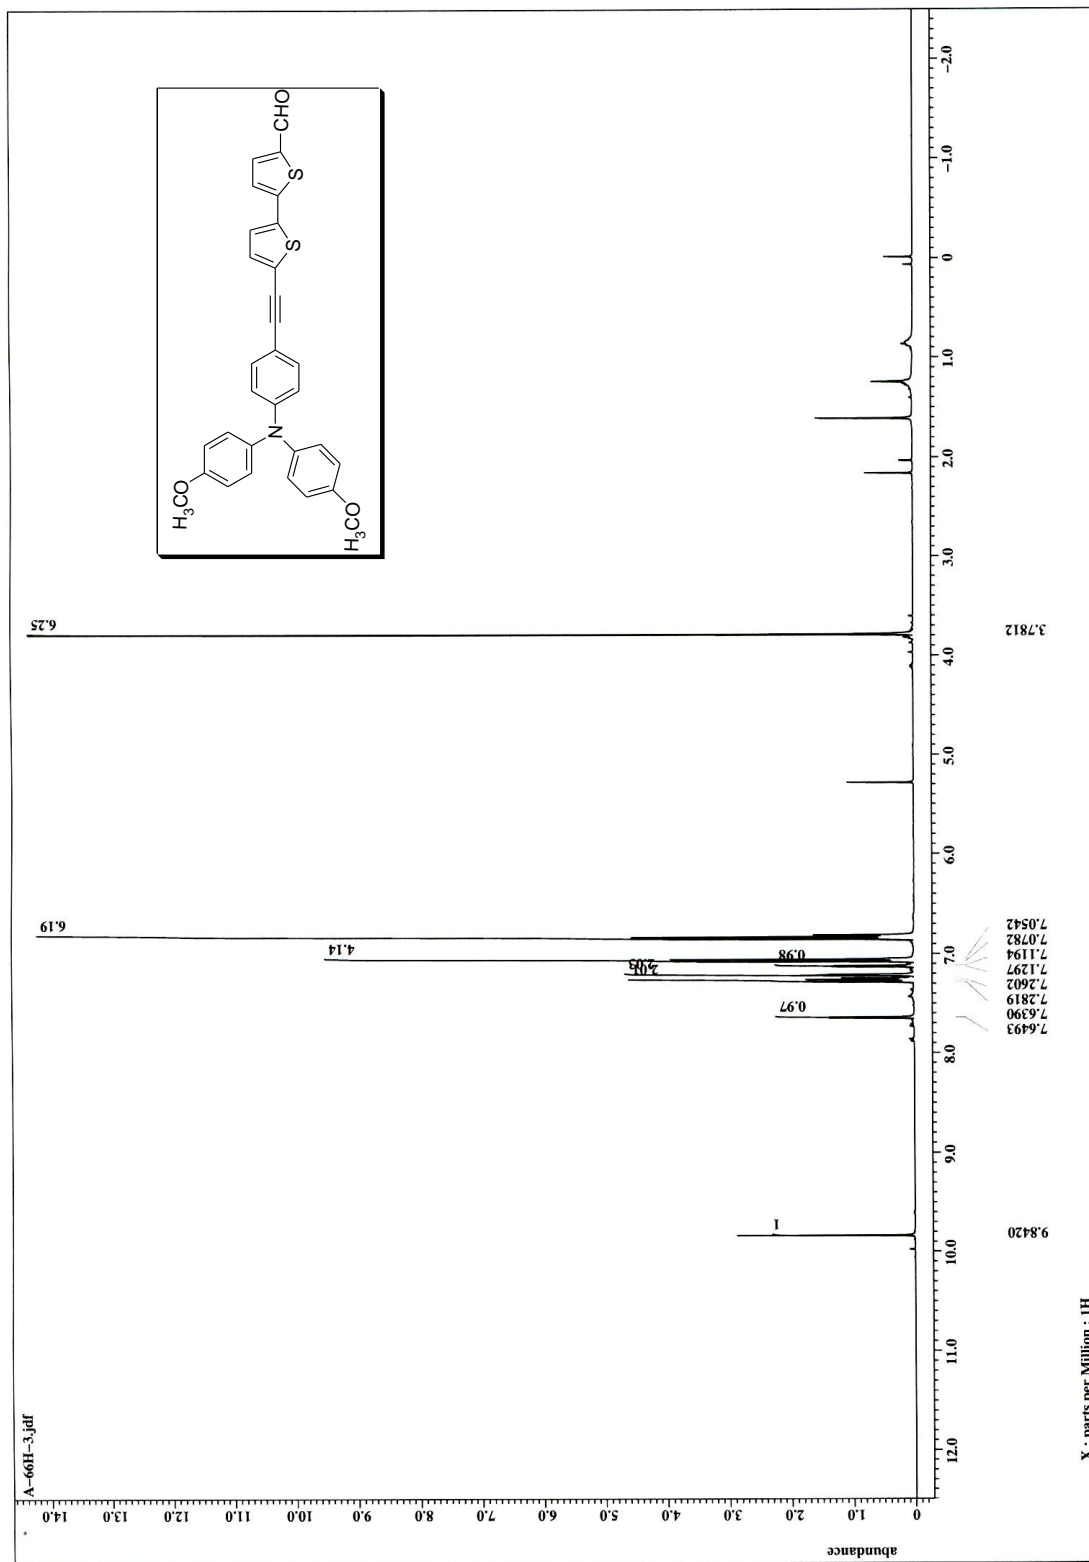

**Figure S14.**  $^{13}\text{C}$  NMR spectrum of 5-(5-(2-(4-(bis(4-methoxyphenyl)amino)ethynyl)thiophene-2-yl)thiophene-2-yl)thiophene-2-carbaldehyde (16)

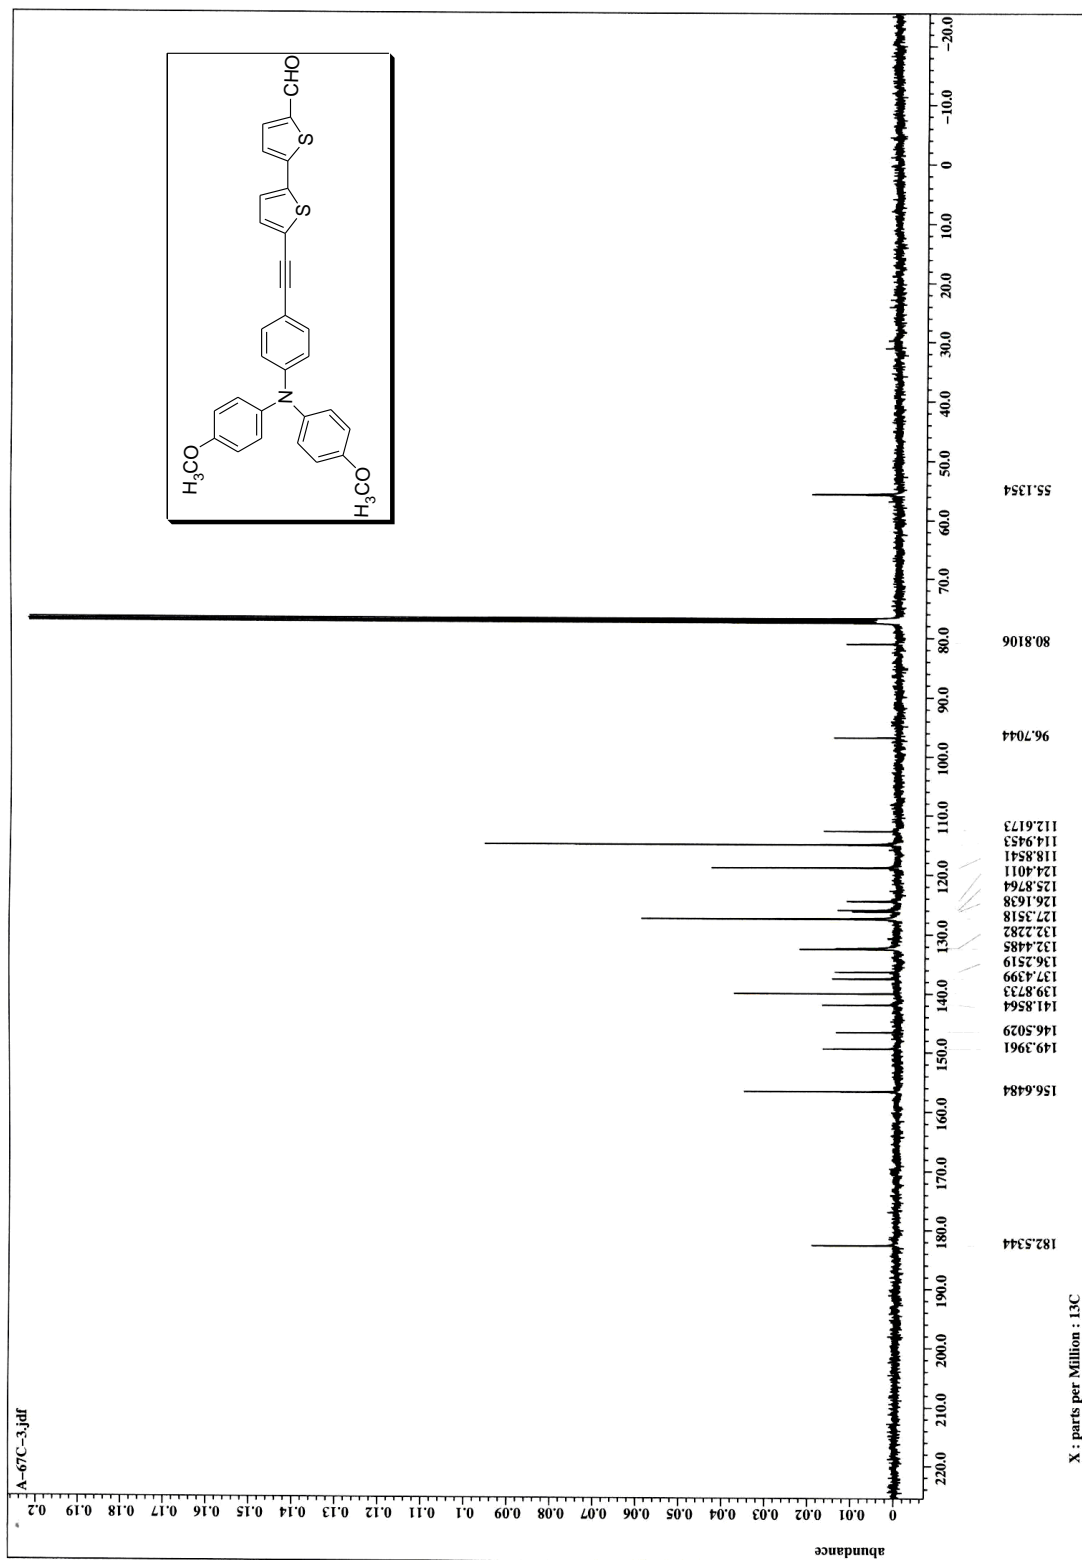

**Figure S15.**  $^1\text{H}$  NMR spectrum of Dye D3

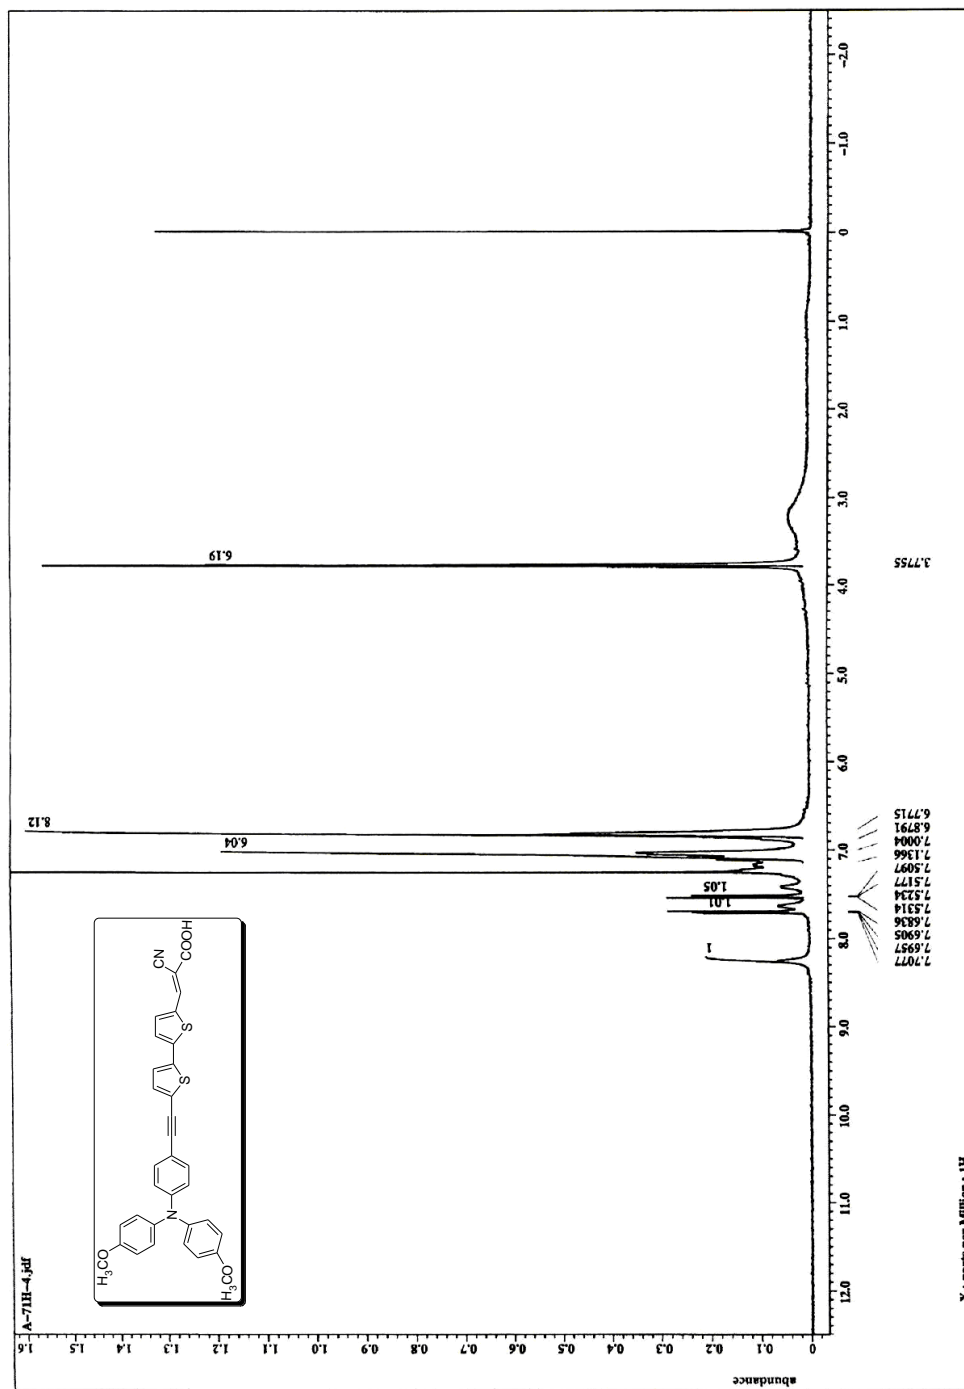

**Figure S16.**  $^{13}\text{C}$  NMR spectrum of Dye D3

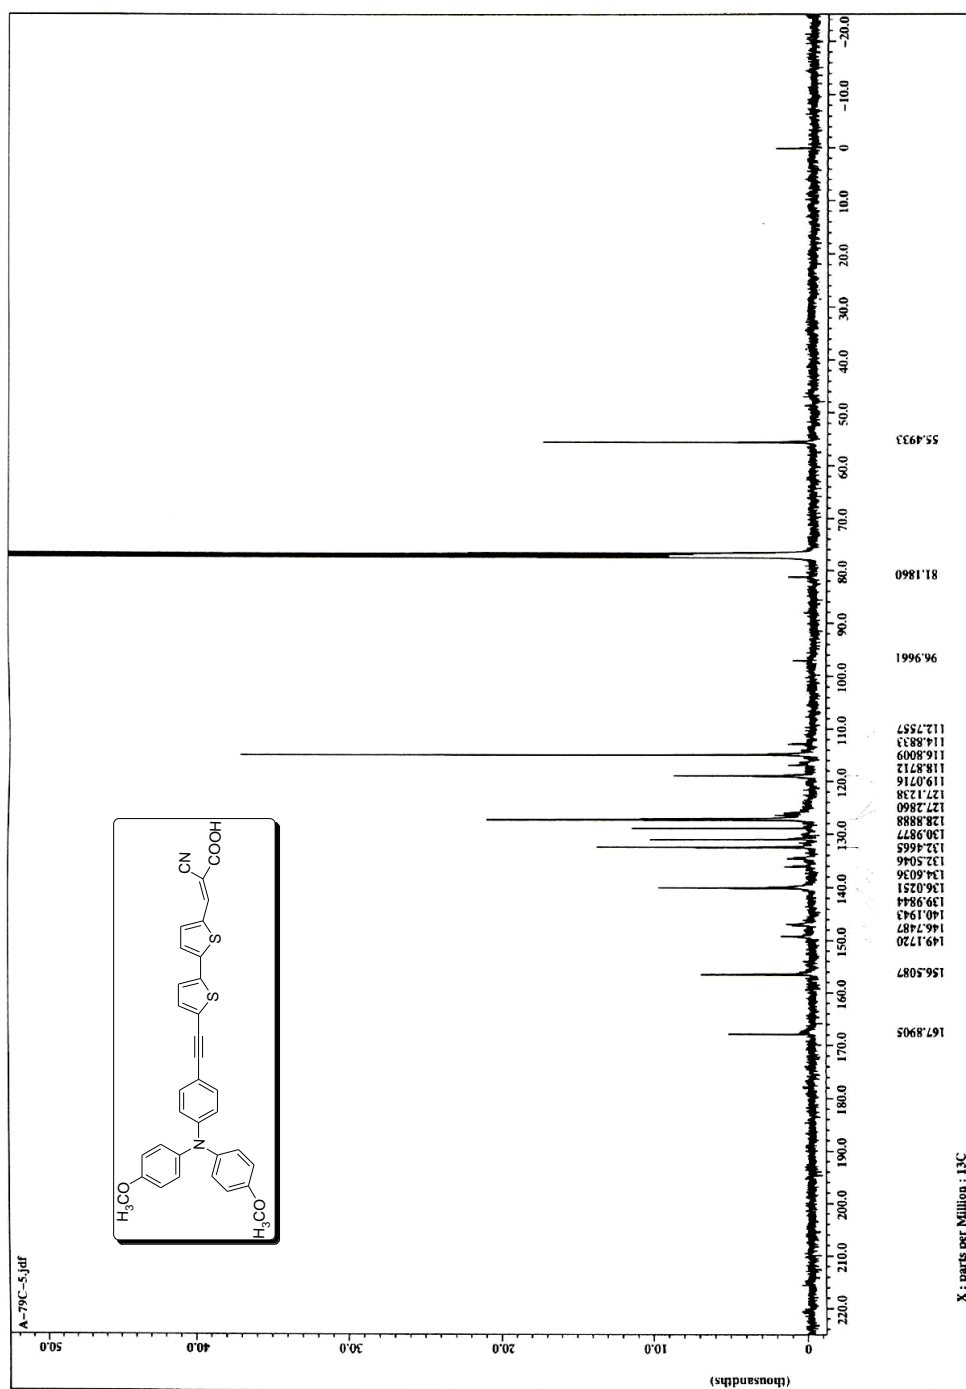

**Figure S17. HRMS spectrum of Dye D3**

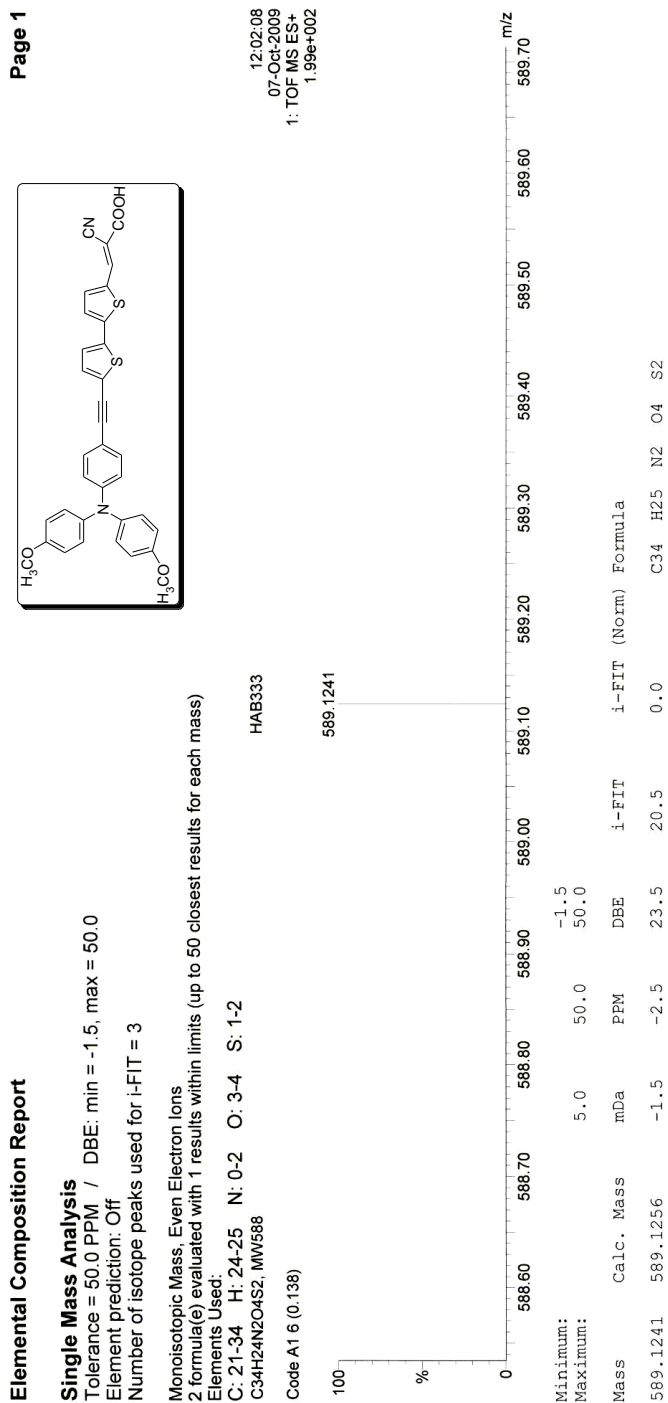

Supplement: c0nj00653j.pdf [file c0nj00653j.pdf]
